# Supplementary material for: Self-assemble SnO2@TiO2 porous nanowire–nanosheet heterostructures for enhanced photocatalytic property
Source: Royal Society of Chemistry journal article supplement (doi:10.1039/c4ce01774a), 2014-01-01
Supplement: c4ce01774a1.pdf [file c4ce01774a1.pdf]

# Self-Assemble SnO<sub>2</sub>@TiO<sub>2</sub> Porous Nanowire-Nanosheet Heterostructures for Enhanced Photocatalytic Property

*Banghong Zhou,<sup>1</sup> Shuanglei Yang,<sup>1</sup> Wei Wu,<sup>2</sup> Lingling Sun,<sup>3</sup> Mei Lei,<sup>3</sup> Jun Pan<sup>1,\*</sup> and*

*Xiang Xiong<sup>1,\*</sup>*

<sup>1</sup> State Key Laboratory for Powder Metallurgy, Central South University, Changsha 410083, P. R. China,

<sup>2</sup> Laboratory of Functional Nanomaterials and Printing Electronics, School of Printing and Packaging, Wuhan University, Wuhan 430072, P. R. China,

<sup>3</sup> Key Laboratory of Artificial Micro- and Nano-structures of Ministry of Education, School of Physics and Technology, Wuhan University, Wuhan 430072, P. R. China

**Fig. S1** Nitrogen adsorption-desorption isotherms of SnO<sub>2</sub>@TiO<sub>2</sub> heterostructures. Inset shows the magnified pore size distributions of SnO<sub>2</sub>@TiO<sub>2</sub> heterostructures.

**Fig. S2** HRTEM image of SnO<sub>2</sub>@TiO<sub>2</sub> heterostructures.

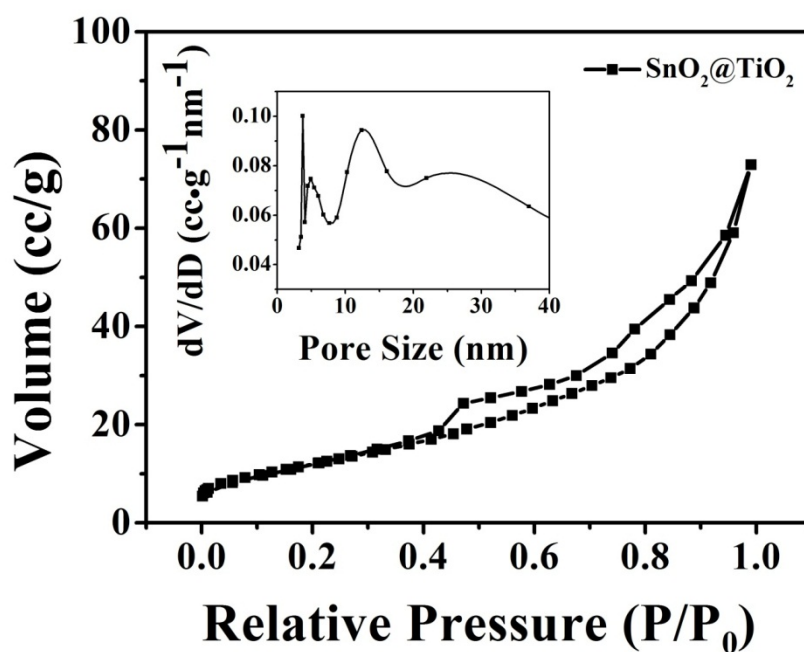

Fig. S1 Nitrogen adsorption-desorption isotherms of SnO<sub>2</sub>@TiO<sub>2</sub> heterostructures. Inset shows the magnified pore size distributions of SnO<sub>2</sub>@TiO<sub>2</sub> heterostructures.

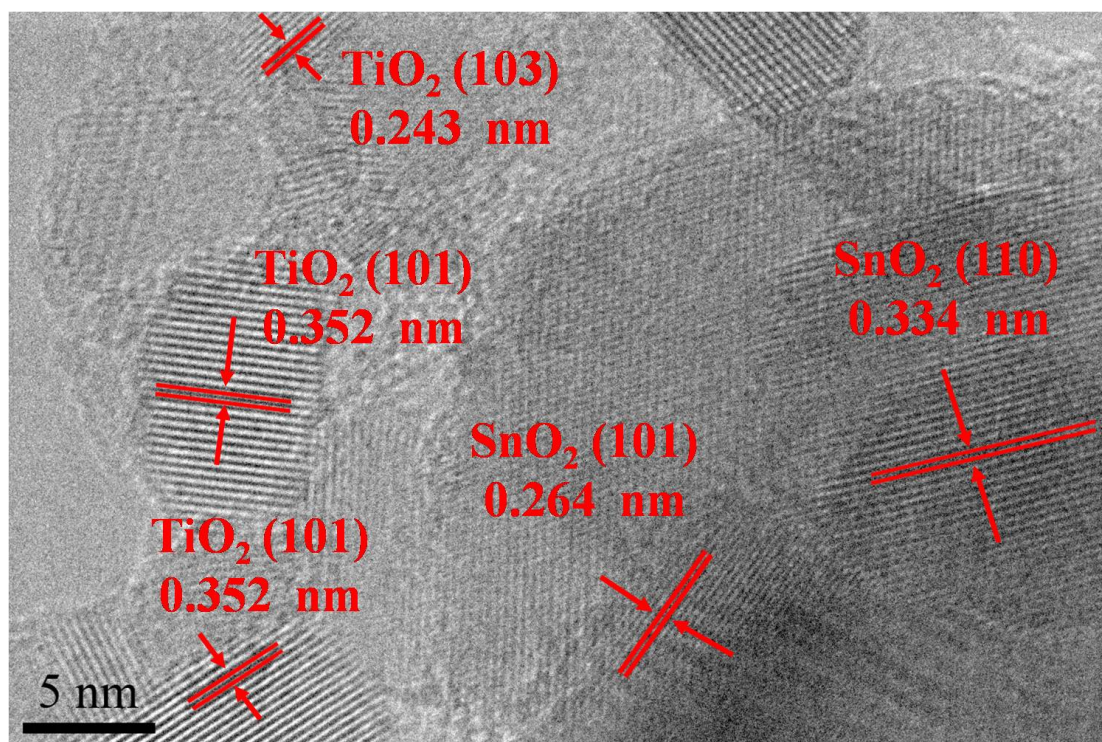

Fig. S2 HRTEM image of SnO<sub>2</sub>@TiO<sub>2</sub> heterostructures.
